# Supplementary material for: Characterization of RAGE and CK2 Expressions in Human Fetal Membranes
Source: MDPI journal article supplement (doi:10.3390/ijms24044074), 2023-02-17
Supplement: s1 [file s1]

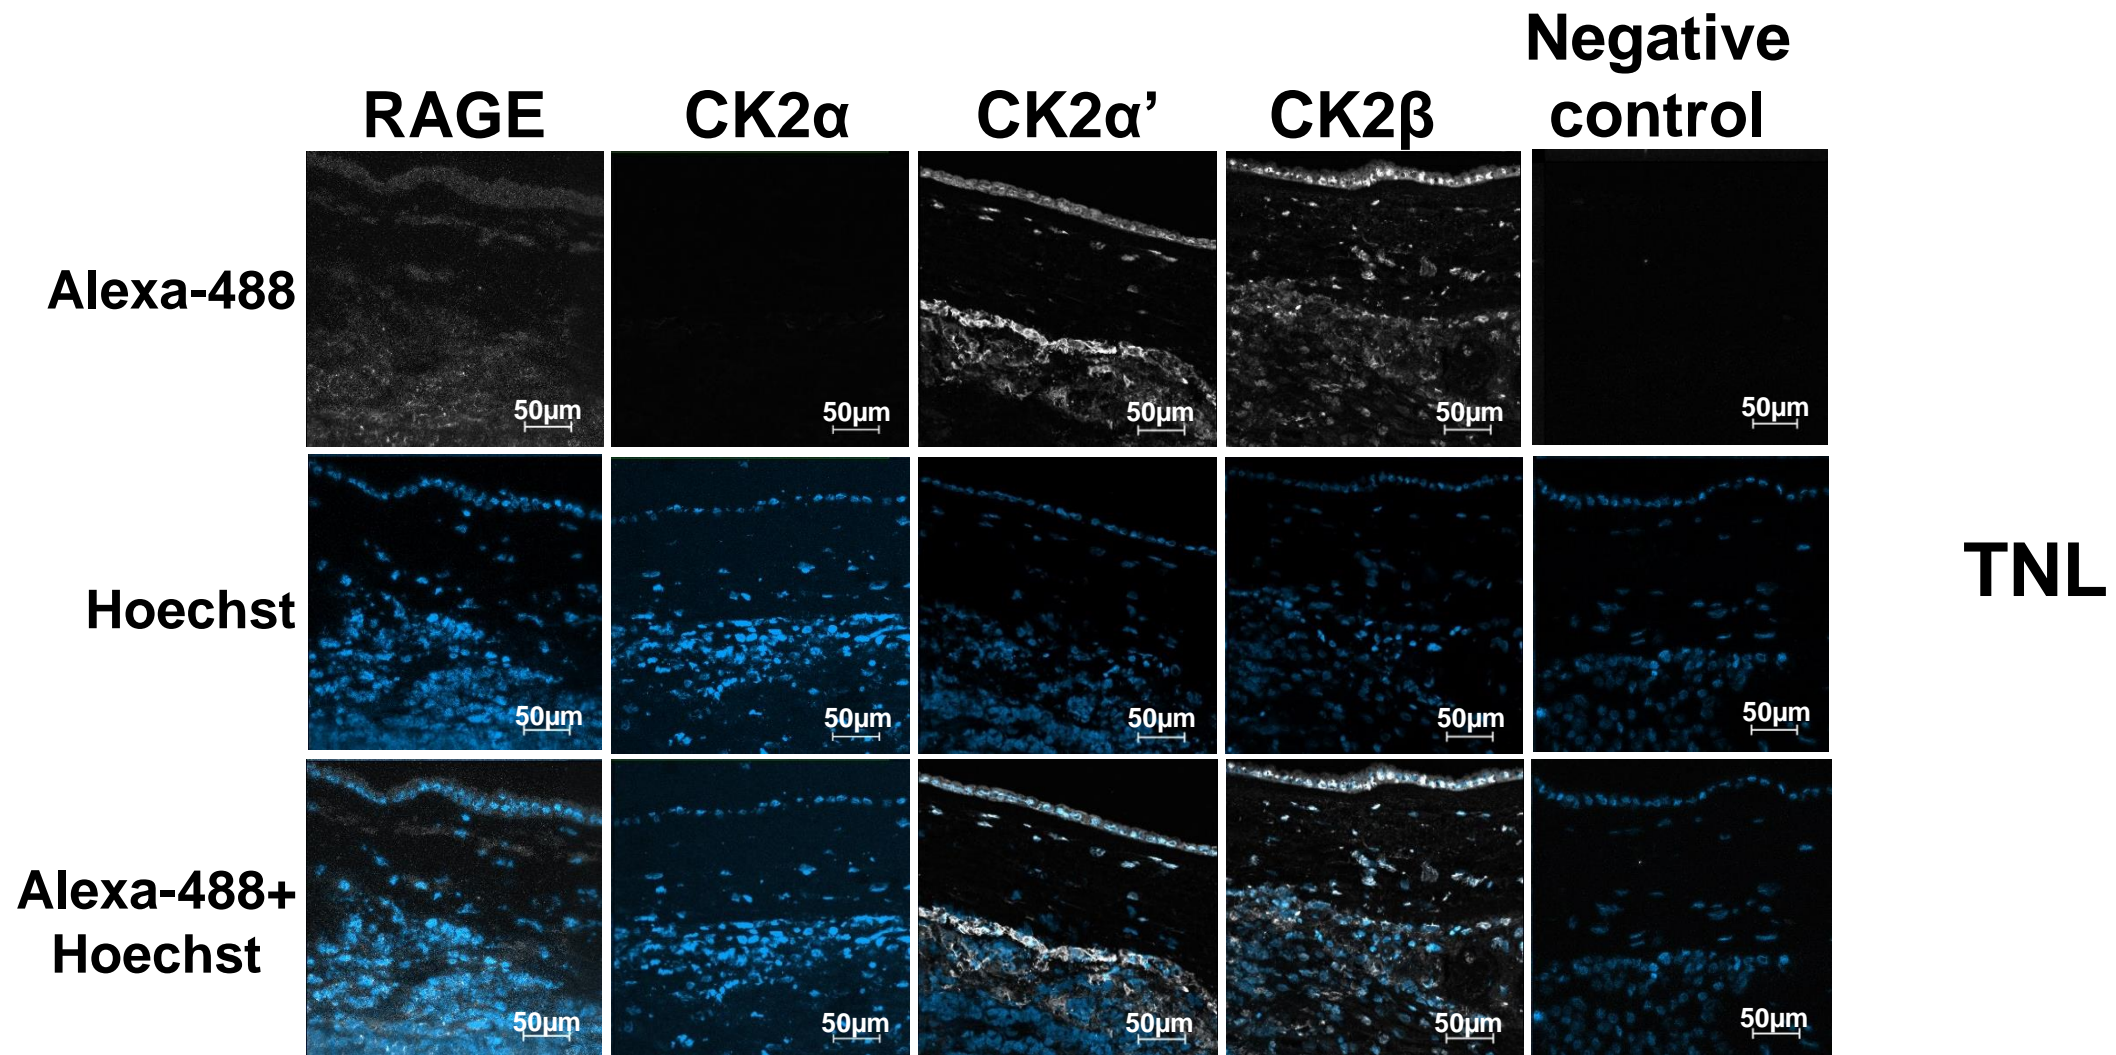

**Figure S2. RAGE and CK2 $\alpha$ , CK2 $\alpha'$ , and CK2 $\beta$  localizations in human fetal membranes at term with no labor (TNL) by immunofluorescence.**
