# Supplementary material for: Characterization of RAGE and CK2 Expressions in Human Fetal Membranes
Source: MDPI journal article supplement (doi:10.3390/ijms24044074), 2023-02-17
Supplement: s1 [file s1]

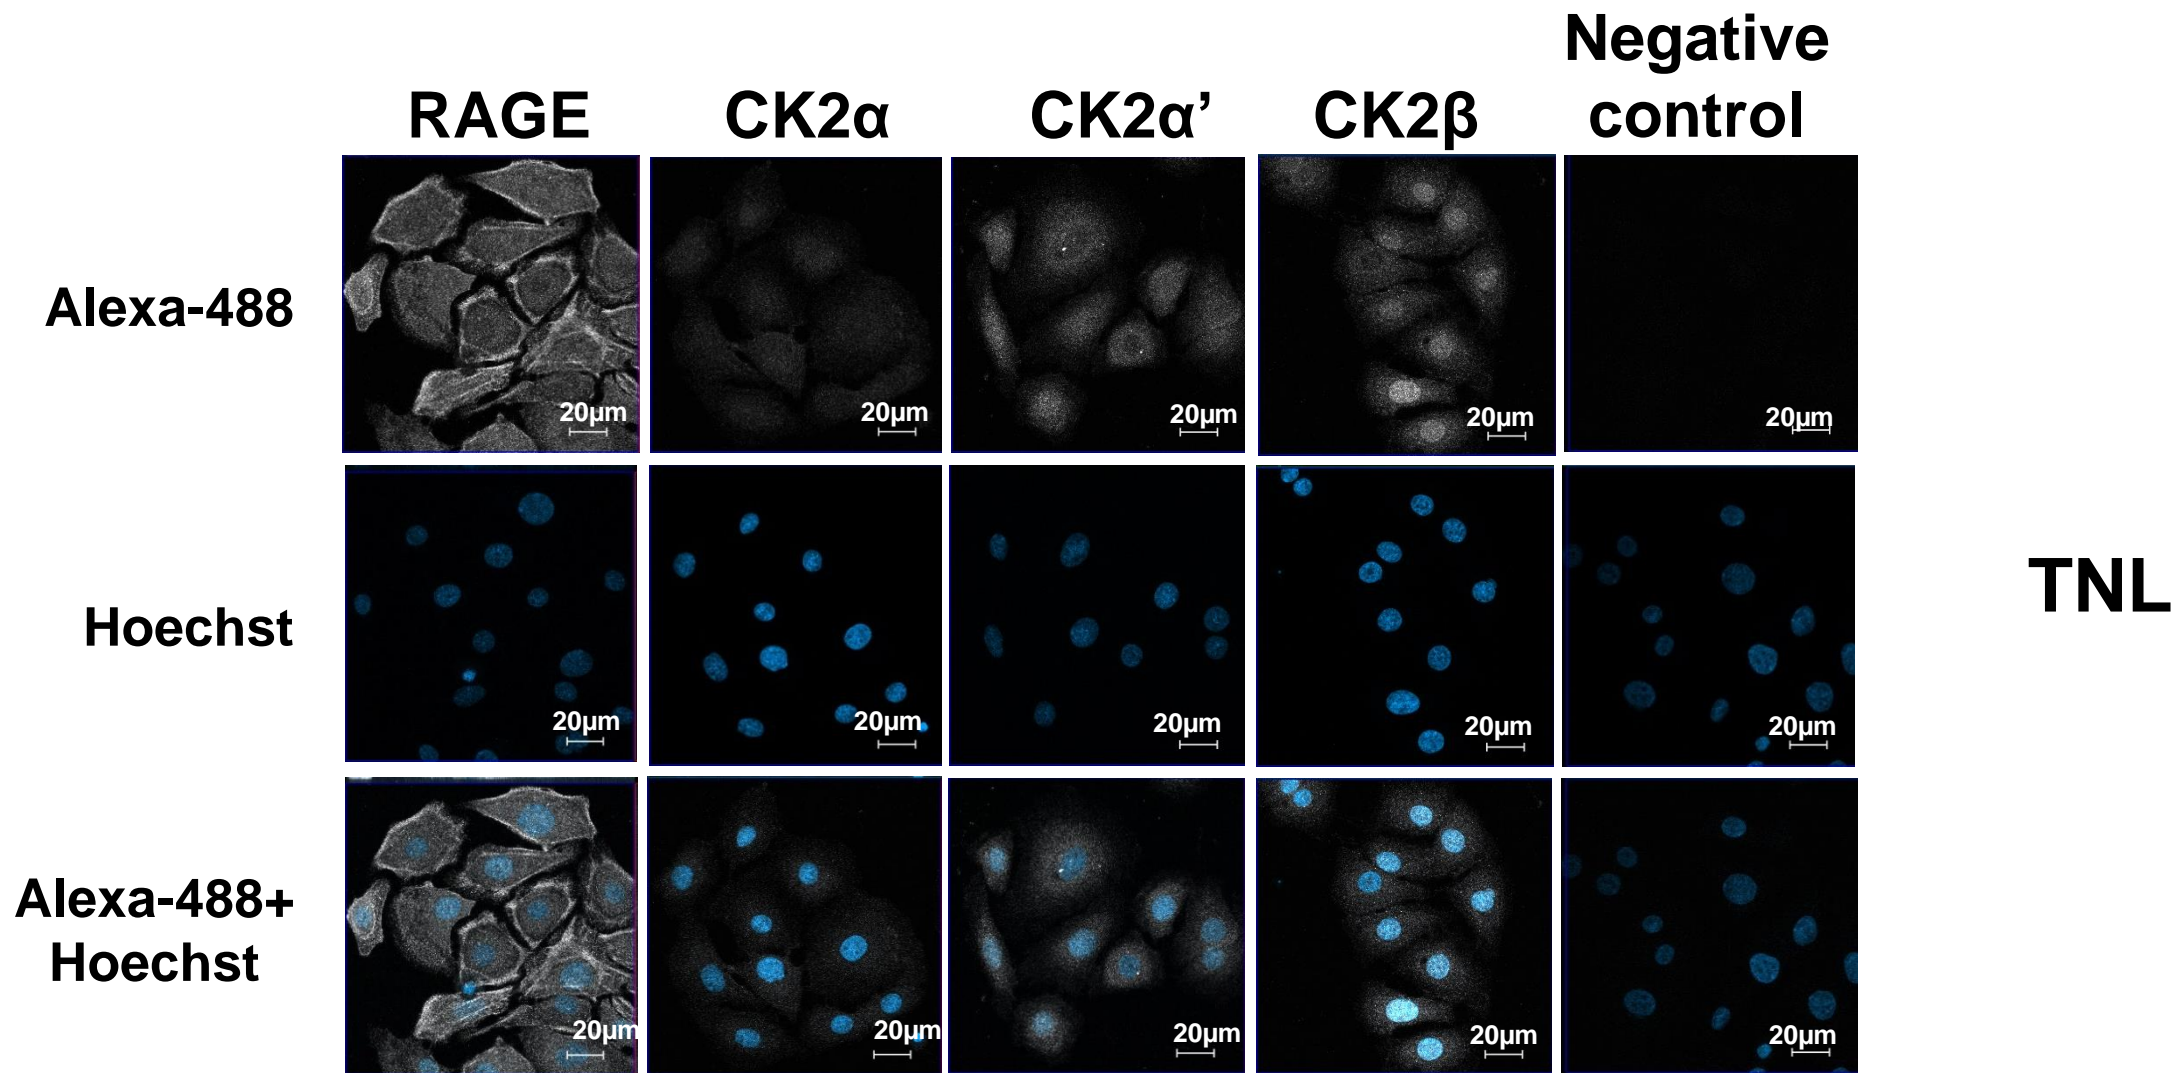

**Figure S4. Immunolocalizations of RAGE and the CK2 subunits in the primary human amniotic epithelial cells at term with spontaneous labor (TNL).**
